# Supplementary material for: Identification of upstream miRNAs of SNAI2 and their influence on the metastasis of gastrointestinal stromal tumors
Source: Springer Nature journal article supplement (doi:10.1186/s12935-019-1006-8), 2019-11-12
Supplement: MOESM1 [file 17378976]

| miRNA                  | Position | seed      | matc  | context++ | context++ | weighted | conserve | cPct |
|------------------------|----------|-----------|-------|-----------|-----------|----------|----------|------|
| Conserved sites        |          |           |       |           |           |          |          |      |
| hsa-miR-203a-3p.1      | 351-357  | 7mer-1A   | -0.1  | 86        | -0.1      | 3.923    | 0.23     |      |
| hsa-miR-429            | 369-375  | 7mer-m8   | -0.17 | 93        | -0.17     | 3.271    | 0.43     |      |
| hsa-miR-200b-3p        | 369-375  | 7mer-m8   | -0.17 | 93        | -0.17     | 3.271    | 0.43     |      |
| hsa-miR-200c-3p        | 369-375  | 7mer-m8   | -0.16 | 92        | -0.16     | 3.271    | 0.43     |      |
| hsa-miR-124-3p.1       | 439-446  | 8mer      | -0.48 | 99        | -0.48     | 3.489    | 0.74     |      |
| hsa-miR-181b-5p        | 587-593  | 7mer-1A   | -0.26 | 96        | -0.26     | 4.394    | 0.45     |      |
| hsa-miR-181c-5p        | 587-593  | 7mer-1A   | -0.26 | 96        | -0.26     | 4.394    | 0.45     |      |
| hsa-miR-181a-5p        | 587-593  | 7mer-1A   | -0.26 | 96        | -0.26     | 4.394    | 0.45     |      |
| hsa-miR-181d-5p        | 587-593  | 7mer-1A   | -0.25 | 95        | -0.25     | 4.394    | 0.45     |      |
| hsa-miR-4262           | 587-593  | 7mer-1A   | -0.17 | 94        | -0.17     | 4.394    | 0.45     |      |
| hsa-miR-655-3p         | 590-597  | 8mer      | -0.24 | 95        | -0.24     | 2.671    | N/A      |      |
| hsa-miR-374c-5p        | 590-597  | 8mer      | -0.25 | 95        | -0.25     | 2.671    | N/A      |      |
| hsa-miR-124-3p.1       | 639-645  | 7mer-m8   | -0.32 | 96        | -0.32     | 4.391    | 0.84     |      |
| hsa-miR-206            | 673-679  | 7mer-m8   | -0.27 | 94        | -0.27     | 4.271    | 0.71     |      |
| hsa-miR-1-3p           | 673-679  | 7mer-m8   | -0.27 | 94        | -0.27     | 4.271    | 0.71     |      |
| hsa-miR-613            | 673-679  | 7mer-m8   | -0.25 | 93        | -0.25     | 4.271    | 0.71     |      |
| hsa-miR-33a-5p         | 816-822  | 7mer-1A   | -0.2  | 97        | -0.2      | 3.718    | 0.3      |      |
| hsa-miR-33b-5p         | 816-822  | 7mer-1A   | -0.2  | 97        | -0.2      | 3.718    | 0.3      |      |
| hsa-miR-124-3p.1       | 843-849  | 7mer-m8   | -0.48 | 99        | -0.48     | 3.975    | 0.76     |      |
| Poorly conserved sites |          |           |       |           |           |          |          |      |
| hsa-miR-4444           | 19-25    | 7mer-1A   | -0.34 | 90        | -0.34     | 0        | N/A      |      |
| hsa-miR-26b-3p         | 23-29    | 7mer-1A   | -0.16 | 86        | -0.16     | 0.031    | N/A      |      |
| hsa-miR-4652-3p        | 24-30    | 7mer-m8   | -0.06 | 88        | -0.06     | 0        | N/A      |      |
| hsa-miR-4778-5p        | 25-31    | 7mer-m8   | -0.14 | 91        | -0.14     | 0        | N/A      |      |
| hsa-miR-586            | 29-35    | 7mer-m8   | -0.17 | 90        | -0.17     | 0.016    | N/A      |      |
| hsa-miR-5700           | 30-36    | 7mer-m8   | -0.17 | 94        | -0.17     | 0.137    | N/A      |      |
| hsa-miR-5680           | 33-39    | 7mer-m8   | -0.02 | 86        | -0.02     | 0        | N/A      |      |
| hsa-miR-3185           | 36-42    | 7mer-1A   | -0.11 | 87        | -0.11     | 0        | N/A      |      |
| hsa-miR-6815-3p        | 47-53    | 7mer-1A   | -0.09 | 67        | -0.09     | 0        | N/A      |      |
| hsa-miR-664b-3p        | 52-58    | 7mer-m8   | -0.03 | 83        | -0.03     | 0.043    | N/A      |      |
| hsa-miR-579-3p         | 52-58    | 7mer-m8   | -0.02 | 65        | -0.02     | 0.043    | N/A      |      |
| hsa-miR-616-3p         | 54-60    | 7mer-1A   | -0.14 | 83        | -0.14     | 0.016    | N/A      |      |
| hsa-miR-5009-5p        | 65-72    | 8mer      | -0.55 | 99        | -0.55     | 0.239    | N/A      |      |
| hsa-miR-8058           | 65-72    | 8mer      | -0.56 | 99        | -0.56     | 0.239    | N/A      |      |
| hsa-miR-4529-3p        | 66-73    | 8mer      | -0.54 | 99        | -0.54     | 0        | N/A      |      |
| hsa-miR-1269a          | 66-72    | 7mer-1A   | -0.3  | 95        | -0.3      | 0.223    | N/A      |      |
| hsa-miR-1269b          | 66-72    | 7mer-1A   | -0.3  | 95        | -0.3      | 0.223    | N/A      |      |
| hsa-miR-7850-5p        | 67-73    | 7mer-m8   | -0.2  | 98        | -0.2      | 0        | N/A      |      |
| hsa-miR-4520-2-3p      | 67-73    | 7mer-1A   | -0.22 | 85        | -0.22     | 0        | N/A      |      |
| hsa-miR-455-5p         | 67-78    | non-canon | N/A   | N/A       | N/A       | 0        | N/A      |      |
| hsa-miR-455-5p         | 67-78    | non-canon | N/A   | N/A       | N/A       | 0        | N/A      |      |
| hsa-miR-532-5p         | 72-78    | 7mer-m8   | -0.22 | 94        | -0.22     | 2.795    | N/A      |      |
| hsa-miR-4768-3p        | 81-87    | 7mer-m8   | -0.14 | 90        | -0.14     | 0.031    | N/A      |      |
| hsa-miR-383-3p         | 87-93    | 7mer-1A   | -0.16 | 92        | -0.16     | 0        | N/A      |      |
| hsa-miR-3065-3p        | 87-93    | 7mer-1A   | -0.12 | 85        | -0.12     | 0        | N/A      |      |
| hsa-miR-6801-5p        | 90-96    | 7mer-1A   | -0.23 | 92        | -0.23     | 0        | N/A      |      |
| hsa-miR-5587-5p        | 91-97    | 7mer-1A   | -0.13 | 81        | -0.13     | 0        | N/A      |      |
| hsa-miR-92a-1-5p       | 94-100   | 7mer-1A   | -0.22 | 80        | -0.22     | 0.506    | N/A      |      |
| hsa-miR-659-3p         | 96-102   | 7mer-1A   | -0.06 | 75        | -0.06     | 0        | N/A      |      |
| hsa-miR-5002-5p        | 97-104   | 8mer      | -0.38 | 99        | -0.38     | 0        | N/A      |      |
| hsa-miR-126-5p         | 101-107  | 7mer-1A   | -0.15 | 95        | -0.15     | 0.326    | N/A      |      |
| hsa-miR-4795-3p        | 101-107  | 7mer-m8   | -0.06 | 81        | -0.06     | 0        | N/A      |      |

|                 |         |           |       |     |       |       |      |
|-----------------|---------|-----------|-------|-----|-------|-------|------|
| hsa-miR-656-3p  | 102-108 | 7mer-m8   | -0.06 | 89  | -0.06 | 0.175 | N/A  |
| hsa-miR-5580-3p | 105-111 | 7mer-1A   | -0.12 | 92  | -0.12 | 0     | N/A  |
| hsa-miR-1284    | 108-115 | 8mer      | -0.39 | 98  | -0.39 | 0.016 | N/A  |
| hsa-miR-4796-5p | 110-117 | 8mer      | -0.34 | 96  | -0.34 | 0     | N/A  |
| hsa-miR-4711-3p | 113-119 | 7mer-1A   | -0.18 | 88  | -0.18 | 0     | N/A  |
| hsa-miR-6867-5p | 115-121 | 7mer-1A   | -0.09 | 47  | -0.09 | 0     | N/A  |
| hsa-miR-6867-5p | 116-123 | 8mer      | -0.4  | 95  | -0.4  | 0     | N/A  |
| hsa-miR-6867-5p | 118-125 | 8mer      | -0.4  | 95  | -0.4  | 0     | N/A  |
| hsa-miR-511-3p  | 121-127 | 7mer-1A   | -0.15 | 86  | -0.15 | 0.031 | N/A  |
| hsa-miR-448     | 125-131 | 7mer-m8   | -0.17 | 90  | -0.17 | 0.134 | N/A  |
| hsa-miR-6867-5p | 130-137 | 8mer      | -0.36 | 92  | -0.36 | 0.223 | N/A  |
| hsa-miR-574-5p  | 130-141 | non-canor | N/A   | N/A | N/A   | 0     | N/A  |
| hsa-miR-574-5p  | 130-141 | non-canor | N/A   | N/A | N/A   | 0     | N/A  |
| hsa-miR-574-5p  | 131-143 | non-canor | N/A   | N/A | N/A   | 0     | N/A  |
| hsa-miR-574-5p  | 131-143 | non-canor | N/A   | N/A | N/A   | 0     | N/A  |
| hsa-miR-6867-5p | 132-139 | 8mer      | -0.36 | 93  | -0.36 | 0.223 | N/A  |
| hsa-miR-6867-5p | 134-141 | 8mer      | -0.36 | 92  | -0.36 | 0.223 | N/A  |
| hsa-miR-6867-5p | 136-143 | 8mer      | -0.35 | 92  | -0.35 | 0.223 | N/A  |
| hsa-miR-6867-5p | 138-145 | 8mer      | -0.35 | 92  | -0.35 | 0.223 | N/A  |
| hsa-miR-6867-5p | 140-147 | 8mer      | -0.34 | 91  | -0.34 | 0.223 | N/A  |
| hsa-miR-6867-5p | 142-148 | 7mer-m8   | -0.18 | 70  | -0.18 | 0.223 | N/A  |
| hsa-miR-3650    | 143-149 | 7mer-m8   | -0.25 | 93  | -0.25 | 0     | N/A  |
| hsa-miR-4455    | 144-151 | 8mer      | -0.55 | 98  | -0.55 | 0     | N/A  |
| hsa-miR-6772-5p | 145-151 | 7mer-1A   | -0.22 | 87  | -0.22 | 0     | N/A  |
| hsa-miR-609     | 145-151 | 7mer-1A   | -0.15 | 77  | -0.15 | 0     | N/A  |
| hsa-miR-6748-5p | 146-153 | 8mer      | -0.48 | 98  | -0.48 | 0     | N/A  |
| hsa-miR-6759-5p | 147-153 | 7mer-m8   | -0.24 | 93  | -0.24 | 0     | N/A  |
| hsa-miR-6793-5p | 147-153 | 7mer-1A   | -0.16 | 82  | -0.16 | 0     | N/A  |
| hsa-miR-134-3p  | 148-155 | 8mer      | -0.47 | 99  | -0.47 | 0     | N/A  |
| hsa-miR-7114-5p | 149-155 | 7mer-1A   | -0.19 | 91  | -0.19 | 0     | N/A  |
| hsa-miR-6817-3p | 152-159 | 8mer      | -0.33 | 98  | -0.33 | 0     | N/A  |
| hsa-miR-6873-3p | 153-159 | 7mer-m8   | -0.13 | 80  | -0.13 | 0     | N/A  |
| hsa-miR-7110-3p | 153-159 | 7mer-1A   | -0.04 | 56  | -0.04 | 0     | N/A  |
| hsa-miR-7110-3p | 154-161 | 8mer      | -0.37 | 96  | -0.37 | 0     | N/A  |
| hsa-miR-6817-3p | 155-161 | 7mer-1A   | -0.1  | 79  | -0.1  | 0     | N/A  |
| hsa-miR-6873-3p | 155-161 | 7mer-m8   | -0.12 | 78  | -0.12 | 0     | N/A  |
| hsa-miR-7110-3p | 156-162 | 7mer-m8   | -0.23 | 89  | -0.23 | 0     | N/A  |
| hsa-miR-4660    | 160-167 | 8mer      | -0.49 | 99  | -0.49 | 0.016 | N/A  |
| hsa-miR-1301-3p | 161-168 | 8mer      | -0.41 | 98  | -0.41 | 0.137 | N/A  |
| hsa-miR-5047    | 161-168 | 8mer      | -0.43 | 98  | -0.43 | 0.137 | N/A  |
| hsa-miR-7156-3p | 162-168 | 7mer-1A   | -0.15 | 82  | -0.15 | 0     | N/A  |
| hsa-miR-5581-3p | 171-178 | 8mer      | -0.44 | 99  | -0.44 | 0     | N/A  |
| hsa-miR-6872-3p | 171-177 | 7mer-1A   | -0.15 | 80  | -0.15 | 0     | N/A  |
| hsa-miR-4452    | 176-182 | 7mer-m8   | -0.12 | 91  | -0.12 | 0     | N/A  |
| hsa-miR-4643    | 181-187 | 7mer-m8   | -0.15 | 96  | -0.15 | 0     | N/A  |
| hsa-miR-302b-5p | 188-194 | 7mer-1A   | -0.04 | 85  | -0.04 | 0     | N/A  |
| hsa-miR-302d-5p | 188-194 | 7mer-1A   | -0.01 | 72  | -0.01 | 0     | N/A  |
| hsa-miR-3159    | 195-201 | 7mer-m8   | -0.22 | 95  | -0.22 | 0     | N/A  |
| hsa-miR-541-5p  | 196-202 | 7mer-m8   | -0.21 | 95  | -0.21 | 0.175 | N/A  |
| hsa-miR-3978    | 200-206 | 7mer-m8   | -0.14 | 96  | -0.14 | 0     | N/A  |
| hsa-miR-3688-3p | 201-207 | 7mer-m8   | -0.09 | 82  | -0.09 | 0     | N/A  |
| hsa-miR-4802-3p | 203-209 | 7mer-m8   | -0.24 | 95  | -0.24 | 0     | N/A  |
| hsa-miR-4717-3p | 204-211 | 8mer      | -0.49 | 99  | -0.49 | 0     | N/A  |
| hsa-miR-23b-3p  | 206-212 | 7mer-1A   | -0.14 | 85  | -0.14 | 2.684 | 0.11 |

|                 |         |         |       |    |       |       |       |
|-----------------|---------|---------|-------|----|-------|-------|-------|
| hsa-miR-23a-3p  | 206-212 | 7mer-1A | -0.13 | 83 | -0.13 | 2.684 | 0.11  |
| hsa-miR-23c     | 206-212 | 7mer-1A | -0.11 | 80 | -0.11 | 2.684 | 0.11  |
| hsa-miR-130a-5p | 206-212 | 7mer-1A | -0.04 | 62 | -0.04 | 2.684 | 0.11  |
| hsa-miR-590-3p  | 216-223 | 8mer    | -0.03 | 79 | -0.03 | 0.327 | N/A   |
| hsa-miR-4775    | 217-223 | 7mer-m8 | -0.04 | 90 | -0.04 | 0     | N/A   |
| hsa-miR-5011-5p | 225-231 | 7mer-m8 | -0.05 | 82 | -0.05 | 0     | N/A   |
| hsa-miR-1277-5p | 226-232 | 7mer-m8 | -0.05 | 85 | -0.05 | 0     | N/A   |
| hsa-miR-545-3p  | 231-238 | 8mer    | -0.38 | 99 | -0.38 | 0.043 | N/A   |
| hsa-miR-3617-3p | 233-239 | 7mer-m8 | -0.27 | 93 | -0.27 | 0.031 | N/A   |
| hsa-miR-1287-3p | 240-246 | 7mer-m8 | -0.39 | 96 | -0.39 | 0     | N/A   |
| hsa-miR-6833-3p | 249-255 | 7mer-m8 | -0.26 | 96 | -0.26 | 0     | N/A   |
| hsa-miR-4768-5p | 249-255 | 7mer-m8 | -0.28 | 96 | -0.28 | 0     | N/A   |
| hsa-miR-6873-3p | 249-255 | 7mer-1A | -0.16 | 85 | -0.16 | 0     | N/A   |
| hsa-miR-511-5p  | 258-264 | 7mer-m8 | -0.11 | 92 | -0.11 | 0.016 | N/A   |
| hsa-miR-6830-3p | 258-264 | 7mer-1A | -0.15 | 90 | -0.15 | 0     | N/A   |
| hsa-miR-4693-5p | 262-268 | 7mer-1A | -0.17 | 85 | -0.17 | 0     | N/A   |
| hsa-miR-6730-5p | 268-274 | 7mer-m8 | -0.22 | 96 | -0.22 | 0     | N/A   |
| hsa-miR-4709-3p | 274-281 | 8mer    | -0.39 | 99 | -0.39 | 0.137 | N/A   |
| hsa-miR-153-5p  | 286-292 | 7mer-1A | -0.02 | 49 | -0.02 | 0     | N/A   |
| hsa-miR-1250-3p | 286-292 | 7mer-1A | -0.01 | 46 | -0.01 | 0     | N/A   |
| hsa-miR-664b-3p | 287-293 | 7mer-1A | -0.07 | 91 | -0.07 | 0.016 | N/A   |
| hsa-miR-5696    | 287-293 | 7mer-1A | -0.1  | 90 | -0.1  | 0     | N/A   |
| hsa-miR-579-3p  | 287-293 | 7mer-1A | -0.07 | 90 | -0.07 | 0.016 | N/A   |
| hsa-miR-335-3p  | 289-295 | 7mer-m8 | -0.08 | 92 | -0.08 | 0.031 | N/A   |
| hsa-miR-3140-3p | 292-298 | 7mer-1A | -0.13 | 87 | -0.13 | 0     | N/A   |
| hsa-miR-218-5p  | 294-300 | 7mer-m8 | -0.3  | 95 | -0.3  | 2.367 | 0.19  |
| hsa-miR-636     | 294-300 | 7mer-1A | -0.17 | 88 | -0.17 | 0.031 | N/A   |
| hsa-miR-106a-3p | 299-305 | 7mer-m8 | -0.21 | 95 | -0.21 | 0.223 | N/A   |
| hsa-miR-6876-5p | 312-318 | 7mer-1A | -0.18 | 92 | -0.18 | 0     | N/A   |
| hsa-miR-4476    | 312-318 | 7mer-1A | -0.17 | 91 | -0.17 | 0     | N/A   |
| hsa-miR-651-5p  | 314-320 | 7mer-1A | -0.14 | 88 | -0.14 | 0.016 | N/A   |
| hsa-miR-153-5p  | 320-326 | 7mer-m8 | -0.02 | 50 | -0.02 | 0     | N/A   |
| hsa-miR-33a-5p  | 323-329 | 7mer-1A | -0.11 | 91 | -0.11 | 2.337 | < 0.1 |
| hsa-miR-33b-5p  | 323-329 | 7mer-1A | -0.11 | 91 | -0.11 | 2.337 | < 0.1 |
| hsa-miR-3680-3p | 324-330 | 7mer-m8 | -0.18 | 94 | -0.18 | 0     | N/A   |
| hsa-miR-4495    | 333-339 | 7mer-m8 | -0.11 | 89 | -0.11 | 0     | N/A   |
| hsa-miR-3908    | 337-343 | 7mer-m8 | -0.17 | 96 | -0.17 | 0     | N/A   |
| hsa-miR-885-3p  | 341-347 | 7mer-1A | -0.33 | 98 | -0.33 | 0.043 | N/A   |
| hsa-miR-7150    | 342-348 | 7mer-1A | -0.18 | 84 | -0.18 | 0     | N/A   |
| hsa-miR-182-5p  | 343-349 | 7mer-1A | -0.23 | 89 | -0.23 | 3.345 | 0.4   |
| hsa-miR-1271-5p | 343-349 | 7mer-1A | -0.16 | 84 | -0.16 | 3.345 | 0.4   |
| hsa-miR-96-5p   | 343-349 | 7mer-1A | -0.13 | 81 | -0.13 | 3.345 | 0.4   |
| hsa-miR-580-5p  | 348-354 | 7mer-m8 | -0.11 | 92 | -0.11 | 0     | N/A   |
| hsa-miR-30d-3p  | 358-365 | 8mer    | -0.29 | 98 | -0.29 | 0.164 | N/A   |
| hsa-miR-30e-3p  | 358-365 | 8mer    | -0.28 | 98 | -0.28 | 0.164 | N/A   |
| hsa-miR-30a-3p  | 358-365 | 8mer    | -0.29 | 98 | -0.29 | 0.164 | N/A   |
| hsa-miR-627-3p  | 361-367 | 7mer-1A | -0.04 | 66 | -0.04 | 0     | N/A   |
| hsa-miR-4677-5p | 364-370 | 7mer-m8 | -0.15 | 90 | -0.15 | 0.031 | N/A   |
| hsa-miR-2116-5p | 364-370 | 7mer-1A | -0.11 | 89 | -0.11 | 0     | N/A   |
| hsa-miR-22-5p   | 364-370 | 7mer-1A | -0.08 | 72 | -0.08 | 0.159 | N/A   |
| hsa-miR-26b-3p  | 365-371 | 7mer-m8 | -0.23 | 92 | -0.23 | 0.031 | N/A   |
| hsa-miR-892c-3p | 367-373 | 7mer-1A | -0.11 | 84 | -0.11 | 2.448 | N/A   |
| hsa-miR-452-5p  | 367-373 | 7mer-1A | -0.11 | 83 | -0.11 | 2.448 | N/A   |
| hsa-miR-4676-3p | 367-373 | 7mer-1A | -0.09 | 80 | -0.09 | 2.448 | N/A   |

|                   |         |         |       |    |       |       |       |
|-------------------|---------|---------|-------|----|-------|-------|-------|
| hsa-miR-3942-5p   | 372-378 | 7mer-m8 | -0.17 | 91 | -0.17 | 0     | N/A   |
| hsa-miR-4703-5p   | 372-378 | 7mer-m8 | -0.14 | 89 | -0.14 | 0     | N/A   |
| hsa-miR-330-3p    | 375-381 | 7mer-m8 | -0.16 | 95 | -0.16 | 1.526 | N/A   |
| hsa-miR-524-5p    | 377-384 | 8mer    | -0.18 | 98 | -0.18 | 0.031 | N/A   |
| hsa-miR-520d-5p   | 377-384 | 8mer    | -0.17 | 98 | -0.17 | 0.031 | N/A   |
| hsa-miR-6504-3p   | 380-386 | 7mer-1A | -0.06 | 89 | -0.06 | 0     | N/A   |
| hsa-miR-6504-3p   | 391-398 | 8mer    | -0.16 | 97 | -0.16 | 0     | N/A   |
| hsa-miR-3153      | 402-408 | 7mer-1A | -0.08 | 84 | -0.08 | 0     | N/A   |
| hsa-miR-6733-5p   | 402-408 | 7mer-1A | -0.12 | 83 | -0.12 | 0     | N/A   |
| hsa-miR-4668-5p   | 402-408 | 7mer-1A | -0.12 | 80 | -0.12 | 0     | N/A   |
| hsa-miR-6739-5p   | 402-408 | 7mer-1A | -0.11 | 80 | -0.11 | 0     | N/A   |
| hsa-miR-6871-5p   | 404-410 | 7mer-1A | -0.14 | 77 | -0.14 | 0     | N/A   |
| hsa-miR-202-5p    | 407-414 | 8mer    | -0.25 | 96 | -0.25 | 0.314 | < 0.1 |
| hsa-miR-337-3p    | 408-414 | 7mer-1A | -0.13 | 77 | -0.13 | 0.043 | N/A   |
| hsa-miR-1236-3p   | 411-418 | 8mer    | -0.33 | 97 | -0.33 | 0.016 | N/A   |
| hsa-miR-6515-3p   | 412-418 | 7mer-1A | -0.1  | 78 | -0.1  | 0     | N/A   |
| hsa-miR-6868-5p   | 420-427 | 8mer    | -0.43 | 99 | -0.43 | 0     | N/A   |
| hsa-miR-3128      | 421-427 | 7mer-1A | -0.16 | 87 | -0.16 | 0.223 | N/A   |
| hsa-miR-4720-5p   | 421-427 | 7mer-1A | -0.11 | 83 | -0.11 | 0     | N/A   |
| hsa-miR-4799-3p   | 421-427 | 7mer-1A | -0.12 | 82 | -0.12 | 0     | N/A   |
| hsa-miR-5588-5p   | 421-427 | 7mer-1A | -0.09 | 77 | -0.09 | 0     | N/A   |
| hsa-miR-4682      | 432-438 | 7mer-m8 | -0.06 | 71 | -0.06 | 0     | N/A   |
| hsa-miR-3622b-3p  | 435-441 | 7mer-m8 | -0.21 | 96 | -0.21 | 0     | N/A   |
| hsa-miR-3622a-3p  | 435-441 | 7mer-m8 | -0.18 | 93 | -0.18 | 0     | N/A   |
| hsa-miR-6804-3p   | 436-442 | 7mer-m8 | -0.28 | 93 | -0.28 | 0     | N/A   |
| hsa-miR-506-3p    | 440-447 | 8mer    | -0.32 | 95 | -0.32 | 1.18  | < 0.1 |
| hsa-miR-124-3p. 2 | 440-447 | 8mer    | -0.36 | 94 | -0.36 | 1.18  | < 0.1 |
| hsa-miR-3910      | 440-446 | 7mer-1A | -0.1  | 84 | -0.1  | 0     | N/A   |
| hsa-miR-3714      | 440-446 | 7mer-1A | -0.07 | 83 | -0.07 | 0     | N/A   |
| hsa-miR-7856-5p   | 442-449 | 8mer    | -0.16 | 97 | -0.16 | 0     | N/A   |
| hsa-miR-4477b     | 442-448 | 7mer-1A | -0.14 | 82 | -0.14 | 0     | N/A   |
| hsa-miR-5003-3p   | 447-453 | 7mer-1A | -0.01 | 66 | -0.01 | 0     | N/A   |
| hsa-miR-6505-5p   | 452-459 | 8mer    | -0.26 | 97 | -0.26 | 0.031 | N/A   |
| hsa-miR-890       | 455-461 | 7mer-m8 | -0.25 | 96 | -0.25 | 0.333 | N/A   |
| hsa-miR-6514-5p   | 464-470 | 7mer-m8 | -0.32 | 98 | -0.32 | 0     | N/A   |
| hsa-miR-380-3p    | 469-475 | 7mer-m8 | -0.05 | 76 | -0.05 | 0.244 | N/A   |
| hsa-miR-196a-3p   | 488-494 | 7mer-1A | -0.22 | 87 | -0.22 | 0     | N/A   |
| hsa-miR-5197-5p   | 490-496 | 7mer-m8 | -0.16 | 83 | -0.16 | 0     | N/A   |
| hsa-miR-7159-5p   | 495-502 | 8mer    | -0.22 | 96 | -0.22 | 0     | N/A   |
| hsa-miR-3065-5p   | 495-501 | 7mer-1A | -0.12 | 85 | -0.12 | 0     | N/A   |
| hsa-miR-421       | 496-502 | 7mer-1A | -0.13 | 84 | -0.13 | 1.352 | N/A   |
| hsa-miR-505-3p. 2 | 496-502 | 7mer-1A | -0.04 | 83 | -0.04 | 1.352 | N/A   |
| hsa-miR-5000-5p   | 499-505 | 7mer-1A | -0.15 | 89 | -0.15 | 0     | N/A   |
| hsa-miR-3613-3p   | 512-519 | 8mer    | -0.07 | 84 | -0.07 | 0     | N/A   |
| hsa-miR-552-3p    | 522-528 | 7mer-1A | -0.2  | 88 | -0.2  | 0.016 | N/A   |
| hsa-miR-6835-3p   | 529-536 | 8mer    | -0.37 | 99 | -0.37 | 0.134 | N/A   |
| hsa-miR-4422      | 530-536 | 7mer-1A | -0.09 | 90 | -0.09 | 0     | N/A   |
| hsa-miR-9-3p      | 531-537 | 7mer-1A | -0.13 | 85 | -0.13 | 0.666 | N/A   |
| hsa-miR-548c-3p   | 543-549 | 7mer-1A | -0.01 | 57 | -0.01 | 0.016 | N/A   |
| hsa-miR-6832-3p   | 549-556 | 8mer    | -0.37 | 98 | -0.37 | 0     | N/A   |
| hsa-miR-204-5p    | 550-556 | 7mer-m8 | -0.21 | 93 | -0.21 | 0.091 | < 0.1 |
| hsa-miR-211-5p    | 550-556 | 7mer-m8 | -0.2  | 92 | -0.2  | 0.091 | < 0.1 |
| hsa-miR-4287      | 551-557 | 7mer-m8 | -0.29 | 97 | -0.28 | 0     | N/A   |
| hsa-miR-4685-3p   | 551-557 | 7mer-m8 | -0.25 | 96 | -0.25 | 0     | N/A   |

|                  |         |         |       |    |       |       |       |
|------------------|---------|---------|-------|----|-------|-------|-------|
| hsa-miR-6749-3p  | 553-560 | 8mer    | -0.57 | 99 | -0.57 | 0     | N/A   |
| hsa-miR-4691-5p  | 554-560 | 7mer-1A | -0.16 | 91 | -0.16 | 0     | N/A   |
| hsa-miR-6792-3p  | 554-560 | 7mer-1A | -0.21 | 90 | -0.21 | 0     | N/A   |
| hsa-miR-1238-3p  | 555-561 | 7mer-1A | -0.15 | 92 | -0.15 | 0     | N/A   |
| hsa-miR-670-3p   | 555-561 | 7mer-1A | -0.15 | 87 | -0.15 | 0.487 | N/A   |
| hsa-miR-578      | 568-574 | 7mer-m8 | -0.15 | 92 | -0.15 | 0.239 | N/A   |
| hsa-miR-4677-5p  | 570-577 | 8mer    | -0.31 | 98 | -0.31 | 0.031 | N/A   |
| hsa-miR-2116-5p  | 570-576 | 7mer-1A | -0.08 | 83 | -0.08 | 0     | N/A   |
| hsa-miR-22-5p    | 570-576 | 7mer-1A | -0.04 | 57 | -0.04 | 0.26  | N/A   |
| hsa-miR-6739-3p  | 571-578 | 8mer    | -0.38 | 98 | -0.37 | 0     | N/A   |
| hsa-miR-4273     | 571-577 | 7mer-1A | -0.04 | 80 | -0.04 | 0     | N/A   |
| hsa-miR-7156-5p  | 571-577 | 7mer-1A | -0.07 | 78 | -0.07 | 0     | N/A   |
| hsa-miR-375      | 572-578 | 7mer-1A | -0.17 | 96 | -0.17 | 1.264 | < 0.1 |
| hsa-miR-19a-5p   | 575-581 | 7mer-1A | -0.1  | 85 | -0.1  | 0.031 | N/A   |
| hsa-miR-19b-2-5p | 575-581 | 7mer-1A | -0.1  | 84 | -0.1  | 0.031 | N/A   |
| hsa-miR-19b-1-5p | 575-581 | 7mer-1A | -0.1  | 84 | -0.1  | 0.031 | N/A   |
| hsa-miR-2052     | 575-581 | 7mer-1A | -0.12 | 83 | -0.11 | 0     | N/A   |
| hsa-miR-1914-5p  | 580-586 | 7mer-1A | -0.15 | 87 | -0.15 | 0.137 | N/A   |
| hsa-miR-3653-5p  | 582-588 | 7mer-1A | -0.26 | 98 | -0.26 | 0     | N/A   |
| hsa-miR-1976     | 582-588 | 7mer-1A | -0.16 | 90 | -0.16 | 0     | N/A   |
| hsa-miR-4279     | 583-589 | 7mer-1A | -0.12 | 86 | -0.12 | 0     | N/A   |
| hsa-miR-5003-3p  | 596-602 | 7mer-1A | -0.05 | 87 | -0.05 | 0     | N/A   |
| hsa-miR-4470     | 621-627 | 7mer-1A | -0.09 | 83 | -0.09 | 0     | N/A   |
| hsa-miR-182-5p   | 622-628 | 7mer-m8 | -0.29 | 94 | -0.29 | 1.344 | 0.12  |
| hsa-miR-569      | 628-634 | 7mer-1A | -0.09 | 75 | -0.09 | 0.043 | N/A   |
| hsa-miR-2053     | 628-634 | 7mer-m8 | -0.02 | 67 | -0.02 | 0     | N/A   |
| hsa-miR-452-5p   | 631-637 | 7mer-1A | -0.11 | 84 | -0.11 | 0.971 | N/A   |
| hsa-miR-4676-3p  | 631-637 | 7mer-1A | -0.1  | 81 | -0.09 | 0.971 | N/A   |
| hsa-miR-892c-3p  | 631-637 | 7mer-1A | -0.08 | 77 | -0.08 | 0.971 | N/A   |
| hsa-miR-5582-5p  | 638-644 | 7mer-m8 | -0.24 | 93 | -0.24 | 0     | N/A   |
| hsa-miR-6814-5p  | 642-648 | 7mer-m8 | -0.15 | 90 | -0.15 | 0     | N/A   |
| hsa-miR-361-3p   | 645-651 | 7mer-1A | -0.14 | 79 | -0.14 | 0.043 | N/A   |
| hsa-miR-6749-3p  | 648-654 | 7mer-m8 | -0.13 | 72 | -0.13 | 0     | N/A   |
| hsa-miR-5193     | 650-656 | 7mer-m8 | -0.12 | 77 | -0.12 | 0.137 | N/A   |
| hsa-miR-4667-3p  | 651-658 | 8mer    | -0.27 | 95 | -0.27 | 0     | N/A   |
| hsa-miR-1470     | 652-658 | 7mer-1A | -0.13 | 91 | -0.13 | 0     | N/A   |
| hsa-miR-642a-5p  | 653-659 | 7mer-1A | -0.01 | 34 | -0.01 | 0.043 | N/A   |
| hsa-miR-4446-5p  | 654-660 | 7mer-m8 | -0.03 | 59 | -0.03 | 0     | N/A   |
| hsa-miR-5006-3p  | 654-660 | 7mer-1A | -0.03 | 57 | -0.03 | 0     | N/A   |
| hsa-miR-4755-5p  | 654-660 | 7mer-1A | -0.01 | 43 | -0.01 | 0     | N/A   |
| hsa-miR-3124-3p  | 656-662 | 7mer-1A | -0.15 | 90 | -0.15 | 0.223 | N/A   |
| hsa-miR-330-3p   | 666-672 | 7mer-1A | -0.13 | 94 | -0.13 | 1.522 | N/A   |
| hsa-miR-4787-3p  | 681-687 | 7mer-m8 | -0.34 | 92 | -0.34 | 0     | N/A   |
| hsa-miR-6081     | 687-693 | 7mer-1A | -0.32 | 95 | -0.32 | 0     | N/A   |
| hsa-miR-3617-5p  | 695-701 | 7mer-1A | -0.16 | 95 | -0.16 | 0.016 | N/A   |
| hsa-miR-641      | 695-701 | 7mer-1A | -0.14 | 93 | -0.13 | 0.016 | N/A   |
| hsa-miR-4307     | 709-715 | 7mer-m8 | -0.16 | 96 | -0.16 | 0     | N/A   |
| hsa-miR-33a-3p   | 710-716 | 7mer-m8 | -0.16 | 96 | -0.16 | 0     | N/A   |
| hsa-miR-3662     | 713-719 | 7mer-1A | -0.08 | 98 | -0.08 | 0     | N/A   |
| hsa-miR-4477a    | 717-723 | 7mer-1A | -0.09 | 90 | -0.09 | 0     | N/A   |
| hsa-miR-126-5p   | 718-724 | 7mer-m8 | -0.09 | 89 | -0.09 | 0     | N/A   |
| hsa-miR-944      | 719-725 | 7mer-m8 | -0.1  | 95 | -0.1  | 0.016 | N/A   |
| hsa-miR-3613-3p  | 724-730 | 7mer-1A | -0.09 | 89 | -0.09 | 0     | N/A   |
| hsa-miR-607      | 726-732 | 7mer-1A | -0.01 | 40 | -0.01 | 0     | N/A   |

|                  |         |           |       |     |       |       |       |
|------------------|---------|-----------|-------|-----|-------|-------|-------|
| hsa-miR-1305     | 727-733 | 7mer-1A   | -0.02 | 78  | -0.02 | 0     | N/A   |
| hsa-miR-4775     | 730-737 | 8mer      | -0.03 | 79  | -0.03 | 0     | N/A   |
| hsa-miR-590-3p   | 730-736 | 7mer-1A   | -0.01 | 34  | -0.01 | 0.164 | N/A   |
| hsa-miR-302d-5p  | 738-744 | 7mer-1A   | -0.02 | 80  | -0.02 | 0.137 | N/A   |
| hsa-miR-302b-5p  | 738-744 | 7mer-1A   | -0.02 | 78  | -0.02 | 0.137 | N/A   |
| hsa-miR-3938     | 746-752 | 7mer-1A   | -0.23 | 92  | -0.23 | 0.031 | N/A   |
| hsa-miR-4325     | 752-759 | 8mer      | -0.47 | 99  | -0.47 | 0     | N/A   |
| hsa-miR-7703     | 753-759 | 7mer-1A   | -0.14 | 88  | -0.13 | 0     | N/A   |
| hsa-miR-557      | 754-761 | 8mer      | -0.42 | 99  | -0.42 | 0.043 | N/A   |
| hsa-miR-507      | 754-761 | 8mer      | -0.48 | 99  | -0.48 | 0.043 | N/A   |
| hsa-miR-450b-5p  | 755-761 | 7mer-1A   | -0.16 | 93  | -0.16 | 0.031 | N/A   |
| hsa-miR-3680-3p  | 755-761 | 7mer-1A   | -0.07 | 82  | -0.07 | 0     | N/A   |
| hsa-miR-5187-3p  | 758-770 | non-canon | N/A   | N/A | N/A   | 0     | N/A   |
| hsa-miR-5187-3p  | 758-770 | non-canon | N/A   | N/A | N/A   | 0     | N/A   |
| hsa-miR-6881-3p  | 760-766 | 7mer-m8   | -0.3  | 96  | -0.3  | 0     | N/A   |
| hsa-miR-877-3p   | 760-766 | 7mer-1A   | -0.2  | 89  | -0.2  | 0     | N/A   |
| hsa-miR-6507-5p  | 766-772 | 7mer-1A   | -0.03 | 80  | -0.03 | 0     | N/A   |
| hsa-miR-3618     | 778-789 | non-canon | N/A   | N/A | N/A   | 0     | N/A   |
| hsa-miR-3618     | 778-789 | non-canon | N/A   | N/A | N/A   | 0     | N/A   |
| hsa-miR-323a-3p  | 782-788 | 7mer-1A   | -0.03 | 80  | -0.03 | 1.76  | N/A   |
| hsa-miR-510-3p   | 798-804 | 7mer-1A   | -0.07 | 92  | -0.07 | 0     | N/A   |
| hsa-miR-586      | 803-810 | 8mer      | -0.38 | 98  | -0.38 | 0.016 | N/A   |
| hsa-miR-4536-5p  | 809-815 | 7mer-1A   | -0.22 | 83  | -0.21 | 0.043 | N/A   |
| hsa-miR-25-3p    | 818-824 | 7mer-1A   | -0.16 | 89  | -0.16 | 3.362 | 0.22  |
| hsa-miR-363-3p   | 818-824 | 7mer-1A   | -0.16 | 88  | -0.16 | 3.362 | 0.22  |
| hsa-miR-367-3p   | 818-824 | 7mer-1A   | -0.16 | 88  | -0.16 | 3.362 | 0.22  |
| hsa-miR-92a-3p   | 818-824 | 7mer-1A   | -0.14 | 87  | -0.14 | 3.362 | 0.22  |
| hsa-miR-32-5p    | 818-824 | 7mer-1A   | -0.14 | 86  | -0.14 | 3.362 | 0.22  |
| hsa-miR-92b-3p   | 818-824 | 7mer-1A   | -0.11 | 85  | -0.11 | 3.362 | 0.22  |
| hsa-miR-137      | 819-825 | 7mer-1A   | -0.12 | 68  | -0.12 | 1.122 | < 0.1 |
| hsa-miR-126-5p   | 821-827 | 7mer-1A   | -0.06 | 85  | -0.06 | 0     | N/A   |
| hsa-miR-4795-3p  | 821-827 | 7mer-m8   | -0.02 | 43  | -0.02 | 0     | N/A   |
| hsa-miR-496.2    | 823-829 | 7mer-1A   | -0.11 | 83  | -0.1  | 0.934 | N/A   |
| hsa-miR-5681b    | 828-834 | 7mer-m8   | -0.25 | 95  | -0.25 | 0     | N/A   |
| hsa-miR-503-3p   | 829-835 | 7mer-m8   | -0.2  | 89  | -0.2  | 0     | N/A   |
| hsa-miR-3936     | 832-838 | 7mer-m8   | -0.32 | 97  | -0.32 | 0     | N/A   |
| hsa-miR-3179     | 833-839 | 7mer-m8   | -0.33 | 96  | -0.33 | 0     | N/A   |
| hsa-miR-3202     | 834-841 | 8mer      | -0.42 | 99  | -0.42 | 0     | N/A   |
| hsa-miR-4533     | 835-841 | 7mer-1A   | -0.15 | 86  | -0.15 | 0     | N/A   |
| hsa-miR-6079     | 836-842 | 7mer-1A   | -0.03 | 66  | -0.03 | 0     | N/A   |
| hsa-miR-890      | 838-844 | 7mer-m8   | -0.22 | 94  | -0.22 | 0.333 | N/A   |
| hsa-miR-3614-5p  | 839-845 | 7mer-m8   | -0.26 | 96  | -0.26 | 0     | N/A   |
| hsa-miR-548an    | 844-850 | 7mer-m8   | -0.25 | 96  | -0.25 | 0     | N/A   |
| hsa-miR-7849-3p  | 854-860 | 7mer-1A   | -0.09 | 95  | -0.09 | 0     | N/A   |
| hsa-miR-4666a-3p | 855-862 | 8mer      | -0.23 | 98  | -0.22 | 0     | N/A   |
| hsa-miR-381-3p   | 856-862 | 7mer-1A   | -0.09 | 92  | -0.09 | 1.676 | N/A   |
| hsa-miR-300      | 856-862 | 7mer-1A   | -0.06 | 88  | -0.06 | 1.676 | N/A   |
| hsa-let-7b-3p    | 856-862 | 7mer-m8   | -0.09 | 84  | -0.09 | 0.031 | N/A   |
| hsa-miR-98-3p    | 856-862 | 7mer-m8   | -0.09 | 83  | -0.09 | 0.031 | N/A   |
| hsa-let-7f-1-3p  | 856-862 | 7mer-m8   | -0.09 | 82  | -0.09 | 0.031 | N/A   |
| hsa-let-7a-3p    | 856-862 | 7mer-m8   | -0.08 | 80  | -0.08 | 0.031 | N/A   |
| hsa-miR-1284     | 857-863 | 7mer-m8   | -0.26 | 93  | -0.26 | 0.016 | N/A   |
| hsa-miR-4719     | 881-887 | 7mer-m8   | -0.16 | 96  | -0.16 | 0     | N/A   |
| hsa-miR-548c-3p  | 891-897 | 7mer-1A   | -0.01 | 57  | -0.01 | 0.17  | N/A   |

|                   |           |         |       |    |       |       |     |
|-------------------|-----------|---------|-------|----|-------|-------|-----|
| hsa-miR-3163      | 893-899   | 7mer-1A | -0.01 | 45 | -0.01 | 0     | N/A |
| hsa-miR-4705      | 900-906   | 7mer-1A | -0.12 | 84 | -0.11 | 0     | N/A |
| hsa-miR-6758-3p   | 905-911   | 7mer-m8 | -0.23 | 96 | -0.23 | 0     | N/A |
| hsa-miR-485-3p    | 915-922   | 8mer    | -0.27 | 97 | -0.27 | 0.25  | N/A |
| hsa-miR-539-3p    | 915-922   | 8mer    | -0.34 | 96 | -0.34 | 0.25  | N/A |
| hsa-miR-4328      | 921-927   | 7mer-1A | -0.05 | 78 | -0.05 | 0     | N/A |
| hsa-miR-4797-3p   | 923-929   | 7mer-1A | -0.22 | 95 | -0.22 | 0     | N/A |
| hsa-miR-4264      | 923-929   | 7mer-1A | -0.17 | 90 | -0.17 | 0     | N/A |
| hsa-miR-1264      | 962-968   | 7mer-m8 | -0.12 | 89 | -0.12 | 0.016 | N/A |
| hsa-miR-6882-5p   | 964-970   | 7mer-m8 | -0.25 | 95 | -0.25 | 0     | N/A |
| hsa-miR-125b-2-3p | 965-972   | 8mer    | -0.41 | 99 | -0.41 | 0     | N/A |
| hsa-miR-513b-5p   | 966-973   | 8mer    | -0.39 | 99 | -0.39 | 0.043 | N/A |
| hsa-miR-4457      | 966-972   | 7mer-1A | -0.15 | 88 | -0.15 | 0     | N/A |
| hsa-miR-494-3p    | 978-984   | 7mer-m8 | -0.2  | 97 | -0.2  | 1.332 | N/A |
| hsa-miR-5582-3p   | 1005-1011 | 7mer-m8 | -0.17 | 98 | -0.17 | 0     | N/A |
| hsa-miR-548x-3p   | 1006-1012 | 7mer-m8 | -0.17 | 99 | -0.16 | 0     | N/A |
| hsa-miR-548aj-3p  | 1006-1012 | 7mer-m8 | -0.17 | 99 | -0.16 | 0     | N/A |
| hsa-miR-548aq-3p  | 1006-1012 | 7mer-m8 | -0.15 | 98 | -0.15 | 0     | N/A |
| hsa-miR-548ae-3p  | 1006-1012 | 7mer-m8 | -0.15 | 98 | -0.15 | 0     | N/A |
| hsa-miR-548j-3p   | 1006-1012 | 7mer-m8 | -0.14 | 98 | -0.14 | 0     | N/A |
| hsa-miR-548ah-3p  | 1006-1012 | 7mer-m8 | -0.13 | 98 | -0.13 | 0     | N/A |
| hsa-miR-548am-3p  | 1006-1012 | 7mer-m8 | -0.13 | 98 | -0.13 | 0     | N/A |
| hsa-miR-5701      | 1016-1022 | 7mer-1A | -0.1  | 85 | -0.1  | 0     | N/A |
| hsa-miR-452-5p    | 1021-1027 | 7mer-m8 | -0.29 | 97 | -0.29 | 0.134 | N/A |
| hsa-miR-892c-3p   | 1021-1027 | 7mer-m8 | -0.26 | 96 | -0.26 | 0.134 | N/A |
| hsa-miR-4676-3p   | 1021-1027 | 7mer-m8 | -0.25 | 96 | -0.25 | 0.134 | N/A |
| hsa-miR-548g-3p   | 1023-1029 | 7mer-m8 | -0.26 | 98 | -0.26 | 0     | N/A |
| hsa-miR-548ar-3p  | 1024-1030 | 7mer-m8 | -0.25 | 99 | -0.25 | 0.016 | N/A |
| hsa-miR-548a-3p   | 1024-1030 | 7mer-m8 | -0.2  | 98 | -0.19 | 0.016 | N/A |
| hsa-miR-548f-3p   | 1024-1030 | 7mer-m8 | -0.2  | 98 | -0.2  | 0.016 | N/A |
| hsa-miR-548e-3p   | 1024-1030 | 7mer-m8 | -0.19 | 98 | -0.19 | 0.016 | N/A |
| hsa-miR-548az-3p  | 1024-1030 | 7mer-m8 | -0.17 | 98 | -0.17 | 0.016 | N/A |
| hsa-miR-1323      | 1025-1032 | 8mer    | -0.38 | 99 | -0.38 | 0.043 | N/A |
| hsa-miR-548o-3p   | 1025-1032 | 8mer    | -0.43 | 99 | -0.43 | 0.043 | N/A |
| hsa-miR-551b-5p   | 1029-1036 | 8mer    | -0.28 | 99 | -0.28 | 0.031 | N/A |
| hsa-miR-300       | 1046-1052 | 7mer-1A | -0.07 | 90 | 0     | 0.795 | N/A |
| hsa-miR-381-3p    | 1046-1052 | 7mer-1A | -0.06 | 87 | 0     | 0.795 | N/A |
| hsa-miR-4666a-3p  | 1046-1052 | 7mer-1A | -0.06 | 86 | 0     | 0     | N/A |
| hsa-let-7f-1-3p   | 1046-1052 | 7mer-m8 | -0.08 | 79 | 0     | 0.031 | N/A |
| hsa-let-7a-3p     | 1046-1052 | 7mer-m8 | -0.05 | 72 | 0     | 0.031 | N/A |
| hsa-miR-98-3p     | 1046-1052 | 7mer-m8 | -0.05 | 71 | 0     | 0.031 | N/A |
| hsa-let-7b-3p     | 1046-1052 | 7mer-m8 | -0.04 | 68 | 0     | 0.031 | N/A |
| hsa-miR-4766-5p   | 1057-1063 | 7mer-1A | -0.16 | 96 | 0     | 0.031 | N/A |
| hsa-miR-146a-3p   | 1058-1065 | 8mer    | -0.42 | 99 | 0     | 0     | N/A |
| hsa-miR-3921      | 1059-1065 | 7mer-1A | -0.18 | 93 | 0     | 0     | N/A |
| hsa-miR-301b-5p   | 1059-1065 | 7mer-1A | -0.08 | 89 | 0     | 0.031 | N/A |
| hsa-miR-301a-5p   | 1059-1065 | 7mer-1A | -0.08 | 89 | 0     | 0.031 | N/A |
| hsa-miR-4653-5p   | 1059-1065 | 7mer-1A | -0.15 | 89 | 0     | 0     | N/A |
| hsa-miR-593-3p    | 1060-1066 | 7mer-m8 | -0.33 | 97 | 0     | 0.043 | N/A |
| hsa-miR-3184-3p   | 1062-1068 | 7mer-m8 | -0.27 | 97 | 0     | 0     | N/A |
| hsa-miR-6507-3p   | 1064-1070 | 7mer-1A | -0.09 | 83 | 0     | 0     | N/A |
| hsa-miR-8060      | 1075-1082 | 8mer    | -0.36 | 99 | 0     | 0     | N/A |
| hsa-miR-7154-5p   | 1076-1082 | 7mer-m8 | -0.2  | 93 | 0     | 0     | N/A |
| hsa-miR-150-3p    | 1086-1092 | 7mer-1A | -0.26 | 89 | 0     | 0.031 | N/A |

|                  |                   |       |    |   |       |       |
|------------------|-------------------|-------|----|---|-------|-------|
| hsa-miR-1263     | 1086-1092 7mer-1A | -0.23 | 86 | 0 | 0.016 | N/A   |
| hsa-miR-5087     | 1090-1096 7mer-1A | -0.05 | 68 | 0 | 0     | N/A   |
| hsa-miR-140-5p   | 1092-1098 7mer-m8 | -0.25 | 93 | 0 | 0.093 | < 0.1 |
| hsa-let-7g-3p    | 1097-1104 8mer    | -0.44 | 99 | 0 | 0.031 | N/A   |
| hsa-let-7a-2-3p  | 1097-1104 8mer    | -0.43 | 99 | 0 | 0.031 | N/A   |
| hsa-let-7c-3p    | 1098-1104 7mer-1A | -0.13 | 86 | 0 | 0.031 | N/A   |
| hsa-miR-493-5p   | 1098-1104 7mer-1A | -0.1  | 83 | 0 | 0.093 | N/A   |
| hsa-miR-6844     | 1101-1108 8mer    | -0.33 | 98 | 0 | 0     | N/A   |
| hsa-miR-495-3p   | 1111-1118 8mer    | -0.25 | 99 | 0 | 0.222 | N/A   |
| hsa-miR-5688     | 1111-1118 8mer    | -0.24 | 99 | 0 | 0.222 | N/A   |
| hsa-miR-7-1-3p   | 1112-1118 7mer-1A | -0.04 | 92 | 0 | 0     | N/A   |
| hsa-miR-7-2-3p   | 1112-1118 7mer-1A | -0.04 | 92 | 0 | 0     | N/A   |
| hsa-miR-2053     | 1116-1122 7mer-1A | -0.02 | 65 | 0 | 0     | N/A   |
| hsa-miR-578      | 1119-1126 8mer    | -0.37 | 99 | 0 | 0     | N/A   |
| hsa-miR-153-5p   | 1126-1133 8mer    | -0.19 | 98 | 0 | 0     | N/A   |
| hsa-miR-1250-3p  | 1127-1133 7mer-1A | -0.02 | 66 | 0 | 0     | N/A   |
| hsa-miR-579-3p   | 1128-1134 7mer-1A | -0.1  | 94 | 0 | 0.016 | N/A   |
| hsa-miR-5696     | 1128-1134 7mer-1A | -0.13 | 93 | 0 | 0     | N/A   |
| hsa-miR-664b-3p  | 1128-1134 7mer-1A | -0.09 | 93 | 0 | 0.016 | N/A   |
| hsa-miR-664a-3p  | 1129-1136 8mer    | -0.29 | 99 | 0 | 0.016 | N/A   |
| hsa-miR-1245b-3p | 1149-1155 7mer-1A | -0.2  | 93 | 0 | 0     | N/A   |
| hsa-miR-3942-3p  | 1150-1156 7mer-m8 | -0.12 | 90 | 0 | 0     | N/A   |
| hsa-miR-5100     | 1150-1156 7mer-1A | -0.05 | 75 | 0 | 0     | N/A   |
| hsa-miR-200a-3p  | 1156-1162 7mer-1A | -0.13 | 86 | 0 | 0.892 | < 0.1 |
| hsa-miR-141-3p   | 1156-1162 7mer-1A | -0.13 | 85 | 0 | 0.892 | < 0.1 |
| hsa-miR-3163     | 1162-1168 7mer-m8 | -0.02 | 65 | 0 | 0     | N/A   |
| hsa-miR-4789-3p  | 1166-1172 7mer-m8 | -0.14 | 91 | 0 | 0     | N/A   |
| hsa-miR-374a-5p  | 1176-1182 7mer-1A | -0.12 | 94 | 0 | 0.719 | N/A   |
| hsa-miR-374b-5p  | 1176-1182 7mer-1A | -0.12 | 93 | 0 | 0.719 | N/A   |
| hsa-miR-4795-3p  | 1179-1185 7mer-1A | -0.09 | 86 | 0 | 0     | N/A   |
| hsa-miR-646      | 1190-1197 8mer    | -0.62 | 99 | 0 | 0.016 | N/A   |
| hsa-miR-503-5p   | 1191-1197 7mer-1A | -0.25 | 97 | 0 | 0.093 | < 0.1 |
| hsa-miR-4524a-5p | 1191-1197 7mer-m8 | -0.37 | 96 | 0 | 0     | N/A   |
| hsa-miR-4524b-5p | 1191-1197 7mer-m8 | -0.36 | 96 | 0 | 0     | N/A   |
| hsa-miR-424-5p   | 1191-1197 7mer-1A | -0.28 | 94 | 0 | 0.093 | < 0.1 |
| hsa-miR-16-5p    | 1191-1197 7mer-1A | -0.28 | 94 | 0 | 0.093 | < 0.1 |
| hsa-miR-497-5p   | 1191-1197 7mer-1A | -0.27 | 94 | 0 | 0.093 | < 0.1 |
| hsa-miR-195-5p   | 1191-1197 7mer-1A | -0.28 | 94 | 0 | 0.093 | < 0.1 |
| hsa-miR-15b-5p   | 1191-1197 7mer-1A | -0.26 | 93 | 0 | 0.093 | < 0.1 |
| hsa-miR-15a-5p   | 1191-1197 7mer-1A | -0.26 | 93 | 0 | 0.093 | < 0.1 |
| hsa-miR-6838-5p  | 1191-1197 7mer-1A | -0.24 | 91 | 0 | 0.093 | < 0.1 |
| hsa-miR-4661-5p  | 1194-1200 7mer-1A | -0.26 | 90 | 0 | 0     | N/A   |
| hsa-miR-8084     | 1196-1203 8mer    | -0.18 | 98 | 0 | 0     | N/A   |
| hsa-miR-429      | 1197-1203 7mer-1A | -0.13 | 88 | 0 | 0.131 | < 0.1 |
| hsa-miR-200b-3p  | 1197-1203 7mer-1A | -0.13 | 88 | 0 | 0.131 | < 0.1 |
| hsa-miR-200c-3p  | 1197-1203 7mer-1A | -0.13 | 88 | 0 | 0.131 | < 0.1 |
| hsa-miR-369-3p   | 1198-1204 7mer-m8 | -0.22 | 98 | 0 | 0.094 | N/A   |
| hsa-miR-5692a    | 1200-1206 7mer-m8 | -0.09 | 98 | 0 | 0     | N/A   |
| hsa-miR-548c-3p  | 1203-1209 7mer-1A | -0.01 | 57 | 0 | 0.016 | N/A   |
