# Supplementary material for: Identification of upstream miRNAs of SNAI2 and their influence on the metastasis of gastrointestinal stromal tumors
Source: Springer Nature journal article supplement (doi:10.1186/s12935-019-1006-8), 2019-11-12
Supplement: MOESM2 [file 17378976]

| Name                            | log2 (Ratio)<br>H/L | Name                            | log2 (Ratio)<br>H/L |
|---------------------------------|---------------------|---------------------------------|---------------------|
| <a href="#">hsa-miR-221-3p</a>  | 4.96633957          | <a href="#">hsa-miR-192-5p</a>  | -4.21418783         |
| <a href="#">hsa-miR-222-3p</a>  | 4.87149753          | <a href="#">hsa-miR-133b</a>    | -3.91396843         |
| <a href="#">hsa-miR-146b-5p</a> | 4.39099189          | <a href="#">hsa-miR-133a-3p</a> | -3.78889802         |
| <a href="#">hsa-miR-181a-5p</a> | 4.12880165          | <a href="#">hsa-miR-1-3p</a>    | -3.48465569         |
| <a href="#">hsa-miR-585-5p</a>  | 4.00926602          | <a href="#">hsa-miR-194-5p</a>  | -3.2852683          |
| <a href="#">hsa-miR-34a-5p</a>  | 3.9504062           | <a href="#">hsa-miR-200c-3p</a> | -2.96640703         |
| <a href="#">hsa-miR-196a-5p</a> | 3.92717587          | <a href="#">hsa-miR-200a-3p</a> | -2.88413069         |
| <a href="#">hsa-miR-574-3p</a>  | 3.8123513           | <a href="#">hsa-miR-141-3p</a>  | -2.47709234         |
| <a href="#">hsa-miR-3663-3p</a> | 3.70896294          | <a href="#">hsa-miR-3923</a>    | -2.28133376         |
| <a href="#">hsa-miR-6504-3p</a> | 3.34292466          | <a href="#">hsa-miR-215-5p</a>  | -2.15533807         |
| <a href="#">hsa-miR-466</a>     | 3.34163001          | <a href="#">hsa-miR-200b-3p</a> | -2.14569966         |
| <a href="#">hsa-miR-455-3p</a>  | 3.28645875          | <a href="#">hsa-miR-655-5p</a>  | -1.99371374         |
| <a href="#">hsa-miR-223-3p</a>  | 3.16753727          | <a href="#">hsa-miR-5687</a>    | -1.9693032          |
| <a href="#">hsa-miR-8064</a>    | 3.14191003          | <a href="#">hsa-miR-1909-3p</a> | -1.78508313         |
| <a href="#">hsa-miR-149-5p</a>  | 3.13304788          | <a href="#">hsa-miR-3152-3p</a> | -1.66785551         |
| <a href="#">hsa-miR-129-2-3</a> | 2.81179981          | <a href="#">hsa-miR-3687</a>    | -1.65299357         |
| <a href="#">hsa-miR-424-5p</a>  | 2.71065291          | <a href="#">hsa-miR-3912-5p</a> | -1.64533512         |
| <a href="#">hsa-miR-181b-5p</a> | 2.67849063          | <a href="#">hsa-miR-202-3p</a>  | -1.6303544          |
| <a href="#">hsa-miR-4687-5p</a> | 2.67669284          | <a href="#">hsa-miR-1258</a>    | -1.61361725         |
| <a href="#">hsa-miR-8485</a>    | 2.66795701          | <a href="#">hsa-miR-4665-5p</a> | -1.5901987          |
| <a href="#">hsa-miR-218-5p</a>  | 2.59837308          | <a href="#">hsa-miR-190b</a>    | -1.56687204         |
| <a href="#">hsa-miR-483-3p</a>  | 2.58118877          | <a href="#">hsa-miR-378f</a>    | -1.54955717         |
| <a href="#">hsa-miR-6805-3p</a> | 2.57585943          | <a href="#">hsa-miR-182-5p</a>  | -1.52892847         |
| <a href="#">hsa-miR-132-3p</a>  | 2.5404057           | <a href="#">hsa-miR-28-3p</a>   | -1.49321257         |
| <a href="#">hsa-miR-4324</a>    | 2.53055809          | <a href="#">hsa-miR-422a</a>    | -1.47880895         |
| <a href="#">hsa-miR-34b-5p</a>  | 2.52767525          | <a href="#">hsa-miR-378e</a>    | -1.42584425         |
| <a href="#">hsa-miR-1248</a>    | 2.46752827          | <a href="#">hsa-miR-378a-3p</a> | -1.38830587         |
| <a href="#">hsa-miR-6836-3p</a> | 2.44884914          | <a href="#">hsa-miR-1910-3p</a> | -1.36907919         |
| <a href="#">hsa-miR-125b-5p</a> | 2.38905319          | <a href="#">hsa-miR-378h</a>    | -1.36528446         |
| <a href="#">hsa-miR-125a-5p</a> | 2.38098643          | <a href="#">hsa-miR-3115</a>    | -1.32716474         |
| <a href="#">hsa-miR-335-5p</a>  | 2.37291771          | <a href="#">hsa-miR-378d</a>    | -1.32033308         |
| <a href="#">hsa-miR-3182</a>    | 2.36908788          | <a href="#">hsa-miR-378g</a>    | -1.31973499         |
| <a href="#">hsa-miR-29b-3p</a>  | 2.33330646          | <a href="#">hsa-miR-4437</a>    | -1.29328308         |
| <a href="#">hsa-miR-139-5p</a>  | 2.3110547           | <a href="#">hsa-miR-3945</a>    | -1.27905463         |
| <a href="#">hsa-miR-3064-3p</a> | 2.30909705          | <a href="#">hsa-miR-6841-5p</a> | -1.25633975         |
| <a href="#">hsa-miR-877-3p</a>  | 2.30021863          | <a href="#">hsa-miR-6864-5p</a> | -1.2410081          |
| <a href="#">hsa-miR-3607-5p</a> | 2.28298086          | <a href="#">hsa-miR-6823-5p</a> | -1.19183069         |
| <a href="#">hsa-miR-6072</a>    | 2.27934961          | <a href="#">hsa-miR-378c</a>    | -1.18929776         |
| <a href="#">hsa-miR-6892-3p</a> | 2.2722033           | <a href="#">hsa-miR-10b-5p</a>  | -1.18005487         |
| <a href="#">hsa-miR-6756-3p</a> | 2.1949655           | <a href="#">hsa-miR-338-3p</a>  | -1.12791748         |
| <a href="#">hsa-miR-30a-5p</a>  | 2.15158771          | <a href="#">hsa-miR-125b-1-</a> | -1.11451188         |
| <a href="#">hsa-miR-3151-3p</a> | 2.12379234          | <a href="#">hsa-miR-3195</a>    | -1.10451049         |
| <a href="#">hsa-miR-210-5p</a>  | 2.11117418          | <a href="#">hsa-miR-6889-5p</a> | -1.10307796         |
| <a href="#">hsa-miR-21-3p</a>   | 2.10453058          | <a href="#">hsa-miR-363-3p</a>  | -1.09432738         |
| <a href="#">hsa-miR-7113-3p</a> | 2.10402788          | <a href="#">hsa-miR-296-3p</a>  | -1.0847065          |
| <a href="#">hsa-miR-339-5p</a>  | 2.08608601          | <a href="#">hsa-miR-378i</a>    | -1.07412904         |
| <a href="#">hsa-let-7i-5p</a>   | 2.07424867          | <a href="#">hsa-miR-429</a>     | -1.05012348         |
| <a href="#">hsa-miR-6727-3p</a> | 2.06862181          | <a href="#">hsa-miR-588</a>     | -1.03527548         |
| <a href="#">hsa-miR-197-3p</a>  | 2.06852552          | <a href="#">hsa-miR-199b-5p</a> | -1.02020328         |
| <a href="#">hsa-miR-29a-3p</a>  | 2.05534219          | <a href="#">hsa-miR-4754</a>    | -1.01875009         |
| <a href="#">hsa-miR-3607-3p</a> | 2.04091842          | <a href="#">hsa-miR-30c-1-3</a> | -1.01520376         |
| <a href="#">hsa-miR-6775-3p</a> | 2.04015659          | <a href="#">hsa-miR-4753-5p</a> | -1.00137859         |

|                                  |            |                                  |             |
|----------------------------------|------------|----------------------------------|-------------|
| <a href="#">hsa-miR-4763-5p</a>  | 2.0340185  | <a href="#">hsa-miR-6822-5p</a>  | -0.99955498 |
| <a href="#">hsa-miR-4664-5p</a>  | 2.03131909 | <a href="#">hsa-miR-4489</a>     | -0.99726676 |
| <a href="#">hsa-miR-107</a>      | 2.00127253 | <a href="#">hsa-miR-3122</a>     | -0.990382   |
| <a href="#">hsa-miR-758-5p</a>   | 1.98759498 | <a href="#">hsa-miR-2278</a>     | -0.98540003 |
| <a href="#">hsa-miR-6792-3p</a>  | 1.98551674 | <a href="#">hsa-miR-4770</a>     | -0.98324326 |
| <a href="#">hsa-miR-1228-3p</a>  | 1.9639583  | <a href="#">hsa-miR-4792</a>     | -0.96860647 |
| <a href="#">hsa-miR-4707-3p</a>  | 1.94184083 | <a href="#">hsa-miR-3934-5p</a>  | -0.95826473 |
| <a href="#">hsa-miR-766-3p</a>   | 1.91668644 | <a href="#">hsa-miR-3179</a>     | -0.95656074 |
| <a href="#">hsa-miR-1273g-3p</a> | 1.90696997 | <a href="#">hsa-miR-375</a>      | -0.93801311 |
| <a href="#">hsa-miR-6858-3p</a>  | 1.90588352 | <a href="#">hsa-miR-3665</a>     | -0.93604305 |
| <a href="#">hsa-miR-30d-5p</a>   | 1.88101022 | <a href="#">hsa-miR-7113-5p</a>  | -0.92885124 |
| <a href="#">hsa-miR-181c-5p</a>  | 1.8779009  | <a href="#">hsa-miR-6847-5p</a>  | -0.92353616 |
| <a href="#">hsa-miR-503-5p</a>   | 1.87240222 | <a href="#">hsa-miR-6878-5p</a>  | -0.9231844  |
| <a href="#">hsa-miR-7109-3p</a>  | 1.86971687 | <a href="#">hsa-miR-8063</a>     | -0.92022944 |
| <a href="#">hsa-miR-193b-3p</a>  | 1.85366304 | <a href="#">hsa-miR-32-3p</a>    | -0.91420092 |
| <a href="#">hsa-miR-6804-3p</a>  | 1.83946496 | <a href="#">hsa-miR-659-3p</a>   | -0.91288934 |
| <a href="#">hsa-miR-7108-3p</a>  | 1.83661978 | <a href="#">hsa-miR-3136-5p</a>  | -0.91212724 |
| <a href="#">hsa-miR-675-3p</a>   | 1.82861927 | <a href="#">hsa-miR-6129</a>     | -0.90536313 |
| <a href="#">hsa-miR-451a</a>     | 1.81286123 | <a href="#">hsa-miR-520g-5p</a>  | -0.89653668 |
| <a href="#">hsa-miR-29c-3p</a>   | 1.80162609 | <a href="#">hsa-miR-5090</a>     | -0.89497252 |
| <a href="#">hsa-miR-129-1-3p</a> | 1.79981337 | <a href="#">hsa-miR-4658</a>     | -0.894647   |
| <a href="#">hsa-miR-301a-3p</a>  | 1.79582472 | <a href="#">hsa-miR-490-5p</a>   | -0.89201732 |
| <a href="#">hsa-miR-6809-3p</a>  | 1.76353077 | <a href="#">hsa-miR-3185</a>     | -0.87879829 |
| <a href="#">hsa-miR-4486</a>     | 1.76348543 | <a href="#">hsa-miR-2909</a>     | -0.87446912 |
| <a href="#">hsa-miR-6894-3p</a>  | 1.75698304 | <a href="#">hsa-miR-744-5p</a>   | -0.87107054 |
| <a href="#">hsa-miR-3184-3p</a>  | 1.74902526 | <a href="#">hsa-miR-138-2-3p</a> | -0.857981   |
| <a href="#">hsa-miR-4524a-5p</a> | 1.74050358 | <a href="#">hsa-miR-3186-3p</a>  | -0.8437443  |
| <a href="#">hsa-miR-6867-3p</a>  | 1.7307578  | <a href="#">hsa-miR-6881-5p</a>  | -0.83750453 |
| <a href="#">hsa-miR-1224-3p</a>  | 1.72828506 | <a href="#">hsa-miR-1229-5p</a>  | -0.82801757 |
| <a href="#">hsa-miR-6754-3p</a>  | 1.72263916 | <a href="#">hsa-miR-500a-3p</a>  | -0.82160541 |
| <a href="#">hsa-miR-4701-5p</a>  | 1.71957462 | <a href="#">hsa-miR-5191</a>     | -0.8214991  |
| <a href="#">hsa-miR-6747-3p</a>  | 1.714697   | <a href="#">hsa-miR-3144-5p</a>  | -0.81933419 |
| <a href="#">hsa-miR-6743-3p</a>  | 1.70203846 | <a href="#">hsa-miR-193a-5p</a>  | -0.81863485 |
| <a href="#">hsa-miR-100-5p</a>   | 1.69171038 |                                  |             |
| <a href="#">hsa-miR-320b</a>     | 1.6904438  |                                  |             |
| <a href="#">hsa-miR-6740-3p</a>  | 1.69007746 |                                  |             |
| <a href="#">hsa-miR-6877-3p</a>  | 1.68940567 |                                  |             |
| <a href="#">hsa-miR-664a-3p</a>  | 1.68845234 |                                  |             |
| <a href="#">hsa-miR-1234-3p</a>  | 1.68674721 |                                  |             |
| <a href="#">hsa-miR-103a-3p</a>  | 1.68403174 |                                  |             |
| <a href="#">hsa-miR-22-3p</a>    | 1.68013892 |                                  |             |
| <a href="#">hsa-miR-196b-3p</a>  | 1.6735938  |                                  |             |
| <a href="#">hsa-miR-5096</a>     | 1.66695117 |                                  |             |
| <a href="#">hsa-miR-4769-3p</a>  | 1.65298603 |                                  |             |
| <a href="#">hsa-miR-99a-5p</a>   | 1.64405296 |                                  |             |
| <a href="#">hsa-miR-1273h-3p</a> | 1.64255219 |                                  |             |
| <a href="#">hsa-miR-4695-3p</a>  | 1.63165473 |                                  |             |
| <a href="#">hsa-miR-6511a-3p</a> | 1.63143774 |                                  |             |
| <a href="#">hsa-miR-196b-5p</a>  | 1.62712491 |                                  |             |
| <a href="#">hsa-miR-4728-3p</a>  | 1.62516882 |                                  |             |
| <a href="#">hsa-miR-455-5p</a>   | 1.62343665 |                                  |             |
| <a href="#">hsa-miR-4646-3p</a>  | 1.6190557  |                                  |             |
| <a href="#">hsa-miR-1260a</a>    | 1.61142933 |                                  |             |
| <a href="#">hsa-miR-619-5p</a>   | 1.60154711 |                                  |             |

|                                  |            |
|----------------------------------|------------|
| <a href="#">hsa-miR-1229-3p</a>  | 1.60094786 |
| <a href="#">hsa-miR-6731-3p</a>  | 1.60065918 |
| <a href="#">hsa-miR-6763-3p</a>  | 1.59706454 |
| <a href="#">hsa-miR-6845-3p</a>  | 1.59319109 |
| <a href="#">hsa-miR-146a-5p</a>  | 1.58118086 |
| <a href="#">hsa-miR-6819-3p</a>  | 1.57573393 |
| <a href="#">hsa-miR-140-3p</a>   | 1.56998424 |
| <a href="#">hsa-miR-6793-3p</a>  | 1.56052828 |
| <a href="#">hsa-miR-6862-3p</a>  | 1.55918977 |
| <a href="#">hsa-miR-3935</a>     | 1.55876856 |
| <a href="#">hsa-miR-6861-3p</a>  | 1.55794035 |
| <a href="#">hsa-miR-6812-3p</a>  | 1.55027182 |
| <a href="#">hsa-miR-4758-3p</a>  | 1.54874231 |
| <a href="#">hsa-miR-6784-3p</a>  | 1.54536659 |
| <a href="#">hsa-miR-324-5p</a>   | 1.54337044 |
| <a href="#">hsa-miR-210-3p</a>   | 1.54040289 |
| <a href="#">hsa-miR-99b-5p</a>   | 1.53513277 |
| <a href="#">hsa-miR-484</a>      | 1.53000462 |
| <a href="#">hsa-miR-1260b</a>    | 1.52121735 |
| <a href="#">hsa-miR-3135b</a>    | 1.51983986 |
| <a href="#">hsa-miR-6813-3p</a>  | 1.5183399  |
| <a href="#">hsa-miR-6801-3p</a>  | 1.51097762 |
| <a href="#">hsa-miR-6879-3p</a>  | 1.50505821 |
| <a href="#">hsa-miR-30a-3p</a>   | 1.502111   |
| <a href="#">hsa-miR-6887-3p</a>  | 1.49350625 |
| <a href="#">hsa-miR-6730-3p</a>  | 1.49334418 |
| <a href="#">hsa-miR-6834-3p</a>  | 1.48389091 |
| <a href="#">hsa-miR-3622a-3p</a> | 1.47719542 |
| <a href="#">hsa-miR-6873-3p</a>  | 1.47540886 |
| <a href="#">hsa-miR-4749-3p</a>  | 1.46850574 |
| <a href="#">hsa-miR-6872-3p</a>  | 1.46679913 |
| <a href="#">hsa-miR-191-5p</a>   | 1.4645379  |
| <a href="#">hsa-miR-320a</a>     | 1.46162344 |
| <a href="#">hsa-miR-6769a-3p</a> | 1.46122649 |
| <a href="#">hsa-miR-4722-3p</a>  | 1.46108613 |
| <a href="#">hsa-miR-424-3p</a>   | 1.46033585 |
| <a href="#">hsa-miR-181d-5p</a>  | 1.45311231 |
| <a href="#">hsa-miR-423-3p</a>   | 1.45286685 |
| <a href="#">hsa-miR-7111-3p</a>  | 1.42461245 |
| <a href="#">hsa-miR-3620-3p</a>  | 1.42453126 |
| <a href="#">hsa-miR-148b-3p</a>  | 1.42256046 |
| <a href="#">hsa-miR-3651</a>     | 1.4150375  |
| <a href="#">hsa-miR-6776-3p</a>  | 1.4137211  |
| <a href="#">hsa-miR-6750-3p</a>  | 1.41260327 |
| <a href="#">hsa-miR-634</a>      | 1.41172589 |
| <a href="#">hsa-miR-1281</a>     | 1.41132799 |
| <a href="#">hsa-let-7e-5p</a>    | 1.40801483 |
| <a href="#">hsa-miR-6732-3p</a>  | 1.40744035 |
| <a href="#">hsa-miR-3972</a>     | 1.40047079 |
| <a href="#">hsa-miR-6886-3p</a>  | 1.39929095 |
| <a href="#">hsa-miR-1976</a>     | 1.3860928  |
| <a href="#">hsa-miR-21-5p</a>    | 1.37250681 |
| <a href="#">hsa-miR-30c-5p</a>   | 1.37036213 |
| <a href="#">hsa-miR-129-5p</a>   | 1.36235914 |

|                                  |            |
|----------------------------------|------------|
| <a href="#">hsa-miR-6785-3p</a>  | 1.36211569 |
| <a href="#">hsa-miR-4323</a>     | 1.35255935 |
| <a href="#">hsa-miR-1273a</a>    | 1.34799591 |
| <a href="#">hsa-miR-6882-3p</a>  | 1.3431979  |
| <a href="#">hsa-miR-320d</a>     | 1.34108281 |
| <a href="#">hsa-miR-664b-3p</a>  | 1.33948647 |
| <a href="#">hsa-miR-4258</a>     | 1.33895511 |
| <a href="#">hsa-miR-6890-3p</a>  | 1.33833757 |
| <a href="#">hsa-miR-4723-3p</a>  | 1.3380778  |
| <a href="#">hsa-miR-2110</a>     | 1.32894852 |
| <a href="#">hsa-miR-3119</a>     | 1.32894852 |
| <a href="#">hsa-miR-4433b-5p</a> | 1.32621967 |
| <a href="#">hsa-miR-6865-3p</a>  | 1.3257783  |
| <a href="#">hsa-miR-664a-5p</a>  | 1.31124167 |
| <a href="#">hsa-miR-1470</a>     | 1.30256277 |
| <a href="#">hsa-miR-942-3p</a>   | 1.29658697 |
| <a href="#">hsa-miR-1250-3p</a>  | 1.29083906 |
| <a href="#">hsa-miR-6833-3p</a>  | 1.27623917 |
| <a href="#">hsa-miR-6810-3p</a>  | 1.27131232 |
| <a href="#">hsa-miR-7110-3p</a>  | 1.27054416 |
| <a href="#">hsa-miR-6823-3p</a>  | 1.26858742 |
| <a href="#">hsa-let-7g-5p</a>    | 1.26475088 |
| <a href="#">hsa-miR-532-5p</a>   | 1.25296813 |
| <a href="#">hsa-miR-6803-3p</a>  | 1.25047655 |
| <a href="#">hsa-miR-668-3p</a>   | 1.25046474 |
| <a href="#">hsa-miR-6780b-3p</a> | 1.2446572  |
| <a href="#">hsa-miR-3145-5p</a>  | 1.24315654 |
| <a href="#">hsa-let-7b-3p</a>    | 1.23982702 |
| <a href="#">hsa-miR-4284</a>     | 1.23584413 |
| <a href="#">hsa-miR-4713-5p</a>  | 1.23536003 |
| <a href="#">hsa-miR-1285-5p</a>  | 1.23470568 |
| <a href="#">hsa-miR-6798-3p</a>  | 1.23470568 |
| <a href="#">hsa-miR-6788-3p</a>  | 1.2321737  |
| <a href="#">hsa-miR-6880-3p</a>  | 1.22873953 |
| <a href="#">hsa-miR-6777-3p</a>  | 1.22017319 |
| <a href="#">hsa-miR-6716-3p</a>  | 1.20163386 |
| <a href="#">hsa-miR-486-5p</a>   | 1.19963791 |
| <a href="#">hsa-miR-92b-3p</a>   | 1.19159229 |
| <a href="#">hsa-miR-5196-3p</a>  | 1.19119193 |
| <a href="#">hsa-miR-6779-3p</a>  | 1.18720969 |
| <a href="#">hsa-miR-199a-5p</a>  | 1.18672916 |
| <a href="#">hsa-miR-6815-3p</a>  | 1.18210599 |
| <a href="#">hsa-miR-6893-3p</a>  | 1.16763319 |
| <a href="#">hsa-miR-328-3p</a>   | 1.16677116 |
| <a href="#">hsa-miR-6820-3p</a>  | 1.164653   |
| <a href="#">hsa-miR-106b-5p</a>  | 1.16353216 |
| <a href="#">hsa-miR-6722-5p</a>  | 1.16227672 |
| <a href="#">hsa-miR-1825</a>     | 1.1621632  |
| <a href="#">hsa-miR-4717-5p</a>  | 1.14369346 |
| <a href="#">hsa-miR-3653-5p</a>  | 1.14345003 |
| <a href="#">hsa-miR-6760-3p</a>  | 1.13601023 |
| <a href="#">hsa-miR-4290</a>     | 1.13321322 |
| <a href="#">hsa-miR-26b-5p</a>   | 1.13222556 |
| <a href="#">hsa-miR-6752-3p</a>  | 1.12753324 |

|                                  |            |
|----------------------------------|------------|
| <a href="#">hsa-miR-4685-3p</a>  | 1.10909693 |
| <a href="#">hsa-miR-16-5p</a>    | 1.10618687 |
| <a href="#">hsa-miR-532-3p</a>   | 1.10469738 |
| <a href="#">hsa-miR-6796-3p</a>  | 1.10433666 |
| <a href="#">hsa-miR-664b-5p</a>  | 1.102928   |
| <a href="#">hsa-miR-30b-5p</a>   | 1.10028233 |
| <a href="#">hsa-miR-30e-5p</a>   | 1.09966645 |
| <a href="#">hsa-miR-5194</a>     | 1.09776274 |
| <a href="#">hsa-miR-6761-3p</a>  | 1.09708926 |
| <a href="#">hsa-miR-4254</a>     | 1.09636839 |
| <a href="#">hsa-miR-3175</a>     | 1.08712418 |
| <a href="#">hsa-miR-4745-3p</a>  | 1.08690807 |
| <a href="#">hsa-miR-6765-3p</a>  | 1.08623405 |
| <a href="#">hsa-miR-6741-3p</a>  | 1.08574003 |
| <a href="#">hsa-miR-6797-3p</a>  | 1.08569955 |
| <a href="#">hsa-let-7b-5p</a>    | 1.08430378 |
| <a href="#">hsa-miR-508-5p</a>   | 1.08161377 |
| <a href="#">hsa-miR-6849-3p</a>  | 1.07942691 |
| <a href="#">hsa-let-7d-5p</a>    | 1.07938691 |
| <a href="#">hsa-miR-1225-3p</a>  | 1.06774461 |
| <a href="#">hsa-miR-144-3p</a>   | 1.06354796 |
| <a href="#">hsa-miR-3617-3p</a>  | 1.06122286 |
| <a href="#">hsa-miR-29c-5p</a>   | 1.06080328 |
| <a href="#">hsa-miR-4750-3p</a>  | 1.05201931 |
| <a href="#">hsa-miR-204-5p</a>   | 1.04559687 |
| <a href="#">hsa-miR-320c</a>     | 1.0444872  |
| <a href="#">hsa-miR-25-3p</a>    | 1.04264434 |
| <a href="#">hsa-miR-425-5p</a>   | 1.04215862 |
| <a href="#">hsa-miR-615-3p</a>   | 1.04102727 |
| <a href="#">hsa-miR-4641</a>     | 1.038789   |
| <a href="#">hsa-miR-6511b-3p</a> | 1.03847415 |
| <a href="#">hsa-miR-6729-3p</a>  | 1.03533307 |
| <a href="#">hsa-miR-6509-3p</a>  | 1.03266748 |
| <a href="#">hsa-miR-186-5p</a>   | 1.03095538 |
| <a href="#">hsa-miR-4725-5p</a>  | 1.02844398 |
| <a href="#">hsa-miR-5193</a>     | 1.02725622 |
| <a href="#">hsa-miR-4633-5p</a>  | 1.02621304 |
| <a href="#">hsa-miR-4700-3p</a>  | 1.02504259 |
| <a href="#">hsa-miR-1291</a>     | 1.02272008 |
| <a href="#">hsa-miR-6790-3p</a>  | 1.02223187 |
| <a href="#">hsa-miR-7106-3p</a>  | 1.02120218 |
| <a href="#">hsa-miR-5684</a>     | 1.02106162 |
| <a href="#">hsa-miR-497-5p</a>   | 1.0194912  |
| <a href="#">hsa-miR-142-3p</a>   | 1.01856762 |
| <a href="#">hsa-miR-5100</a>     | 1.00880053 |
| <a href="#">hsa-miR-4667-3p</a>  | 1.00839592 |
| <a href="#">hsa-miR-1296-5p</a>  | 1.00749454 |
| <a href="#">hsa-miR-4485-5p</a>  | 1.00551357 |
| <a href="#">hsa-miR-6746-3p</a>  | 1.00444591 |
| <a href="#">hsa-miR-6800-3p</a>  | 1.00240249 |
| <a href="#">hsa-miR-1285-3p</a>  | 1.00069049 |
| <a href="#">hsa-miR-6787-3p</a>  | 1.0004834  |
| <a href="#">hsa-miR-1322</a>     | 0.99548012 |
| <a href="#">hsa-miR-6769b-3p</a> | 0.99518761 |

|                                  |            |
|----------------------------------|------------|
| <a href="#">hsa-miR-1301-3p</a>  | 0.99421765 |
| <a href="#">hsa-miR-3907</a>     | 0.98830528 |
| <a href="#">hsa-miR-4313</a>     | 0.9867439  |
| <a href="#">hsa-miR-660-5p</a>   | 0.9866622  |
| <a href="#">hsa-miR-6875-3p</a>  | 0.98429256 |
| <a href="#">hsa-miR-6884-3p</a>  | 0.98284842 |
| <a href="#">hsa-miR-1249-3p</a>  | 0.97978678 |
| <a href="#">hsa-miR-93-5p</a>    | 0.97966165 |
| <a href="#">hsa-let-7a-3p</a>    | 0.97780425 |
| <a href="#">hsa-miR-1193</a>     | 0.97741634 |
| <a href="#">hsa-miR-7114-3p</a>  | 0.97130112 |
| <a href="#">hsa-miR-6728-3p</a>  | 0.96413455 |
| <a href="#">hsa-miR-6782-3p</a>  | 0.95935802 |
| <a href="#">hsa-miR-1233-3p</a>  | 0.956456   |
| <a href="#">hsa-let-7a-5p</a>    | 0.95221633 |
| <a href="#">hsa-miR-6759-3p</a>  | 0.95087477 |
| <a href="#">hsa-miR-185-5p</a>   | 0.95047678 |
| <a href="#">hsa-let-7f-5p</a>    | 0.94655784 |
| <a href="#">hsa-miR-6508-5p</a>  | 0.94263378 |
| <a href="#">hsa-miR-1914-3p</a>  | 0.94147805 |
| <a href="#">hsa-miR-6859-3p</a>  | 0.93451092 |
| <a href="#">hsa-miR-4433a-5p</a> | 0.93444746 |
| <a href="#">hsa-miR-3944-3p</a>  | 0.93214291 |
| <a href="#">hsa-miR-6737-3p</a>  | 0.92599942 |
| <a href="#">hsa-miR-551b-3p</a>  | 0.92283214 |
| <a href="#">hsa-miR-1292-3p</a>  | 0.92199749 |
| <a href="#">hsa-miR-320e</a>     | 0.91659932 |
| <a href="#">hsa-miR-5010-5p</a>  | 0.91555387 |
| <a href="#">hsa-miR-151a-3p</a>  | 0.90941215 |
| <a href="#">hsa-miR-6772-3p</a>  | 0.90372112 |
| <a href="#">hsa-miR-148a-3p</a>  | 0.90346445 |
| <a href="#">hsa-miR-4448</a>     | 0.9015543  |
| <a href="#">hsa-miR-330-3p</a>   | 0.90092023 |
| <a href="#">hsa-miR-4638-5p</a>  | 0.89957253 |
| <a href="#">hsa-miR-324-3p</a>   | 0.89897008 |
| <a href="#">hsa-miR-6736-3p</a>  | 0.89879366 |
| <a href="#">hsa-miR-339-3p</a>   | 0.89251557 |
| <a href="#">hsa-miR-6870-3p</a>  | 0.89049582 |
| <a href="#">hsa-miR-92a-3p</a>   | 0.88963456 |
| <a href="#">hsa-miR-31-5p</a>    | 0.88820918 |
| <a href="#">hsa-miR-196a-3p</a>  | 0.88820918 |
| <a href="#">hsa-miR-26a-5p</a>   | 0.88702402 |
| <a href="#">hsa-miR-5095</a>     | 0.88625901 |
| <a href="#">hsa-miR-29b-2-5p</a> | 0.8799693  |
| <a href="#">hsa-miR-6883-3p</a>  | 0.87918359 |
| <a href="#">hsa-miR-15a-5p</a>   | 0.87887165 |
| <a href="#">hsa-miR-939-3p</a>   | 0.87788887 |
| <a href="#">hsa-miR-6130</a>     | 0.87219555 |
| <a href="#">hsa-miR-6734-3p</a>  | 0.86821013 |
| <a href="#">hsa-miR-6514-3p</a>  | 0.86577161 |
| <a href="#">hsa-let-7c-5p</a>    | 0.8635441  |
| <a href="#">hsa-miR-361-5p</a>   | 0.86263343 |
| <a href="#">hsa-miR-363-5p</a>   | 0.86040672 |
| <a href="#">hsa-miR-3609</a>     | 0.86038638 |

|                                 |            |
|---------------------------------|------------|
| <a href="#">hsa-miR-6717-5p</a> | 0.84991538 |
| <a href="#">hsa-miR-146b-3p</a> | 0.84950837 |
| <a href="#">hsa-miR-550b-2-</a> | 0.84890741 |
| <a href="#">hsa-miR-6802-3p</a> | 0.83984816 |
| <a href="#">hsa-miR-342-3p</a>  | 0.83920379 |
| <a href="#">hsa-miR-6832-3p</a> | 0.83748879 |
| <a href="#">hsa-miR-143-5p</a>  | 0.83653578 |
| <a href="#">hsa-miR-34c-5p</a>  | 0.83650127 |
| <a href="#">hsa-miR-4524b-5</a> | 0.8353693  |
| <a href="#">hsa-miR-1273e</a>   | 0.83279751 |
| <a href="#">hsa-miR-6786-3p</a> | 0.82823365 |
| <a href="#">hsa-miR-6831-3p</a> | 0.82759571 |
| <a href="#">hsa-miR-6773-3p</a> | 0.82269547 |
| <a href="#">hsa-miR-874-5p</a>  | 0.81690685 |
| <a href="#">hsa-miR-6825-3p</a> | 0.81068348 |
| <a href="#">hsa-miR-3189-5p</a> | 0.80385748 |
| <a href="#">hsa-miR-4787-3p</a> | 0.80240004 |
